# Supplementary material
Source: PubMed Central journal article supplement (PMC2493263)

**Fig. 1S *C. japonicus* CBM6 and CBM35-containing proteins**

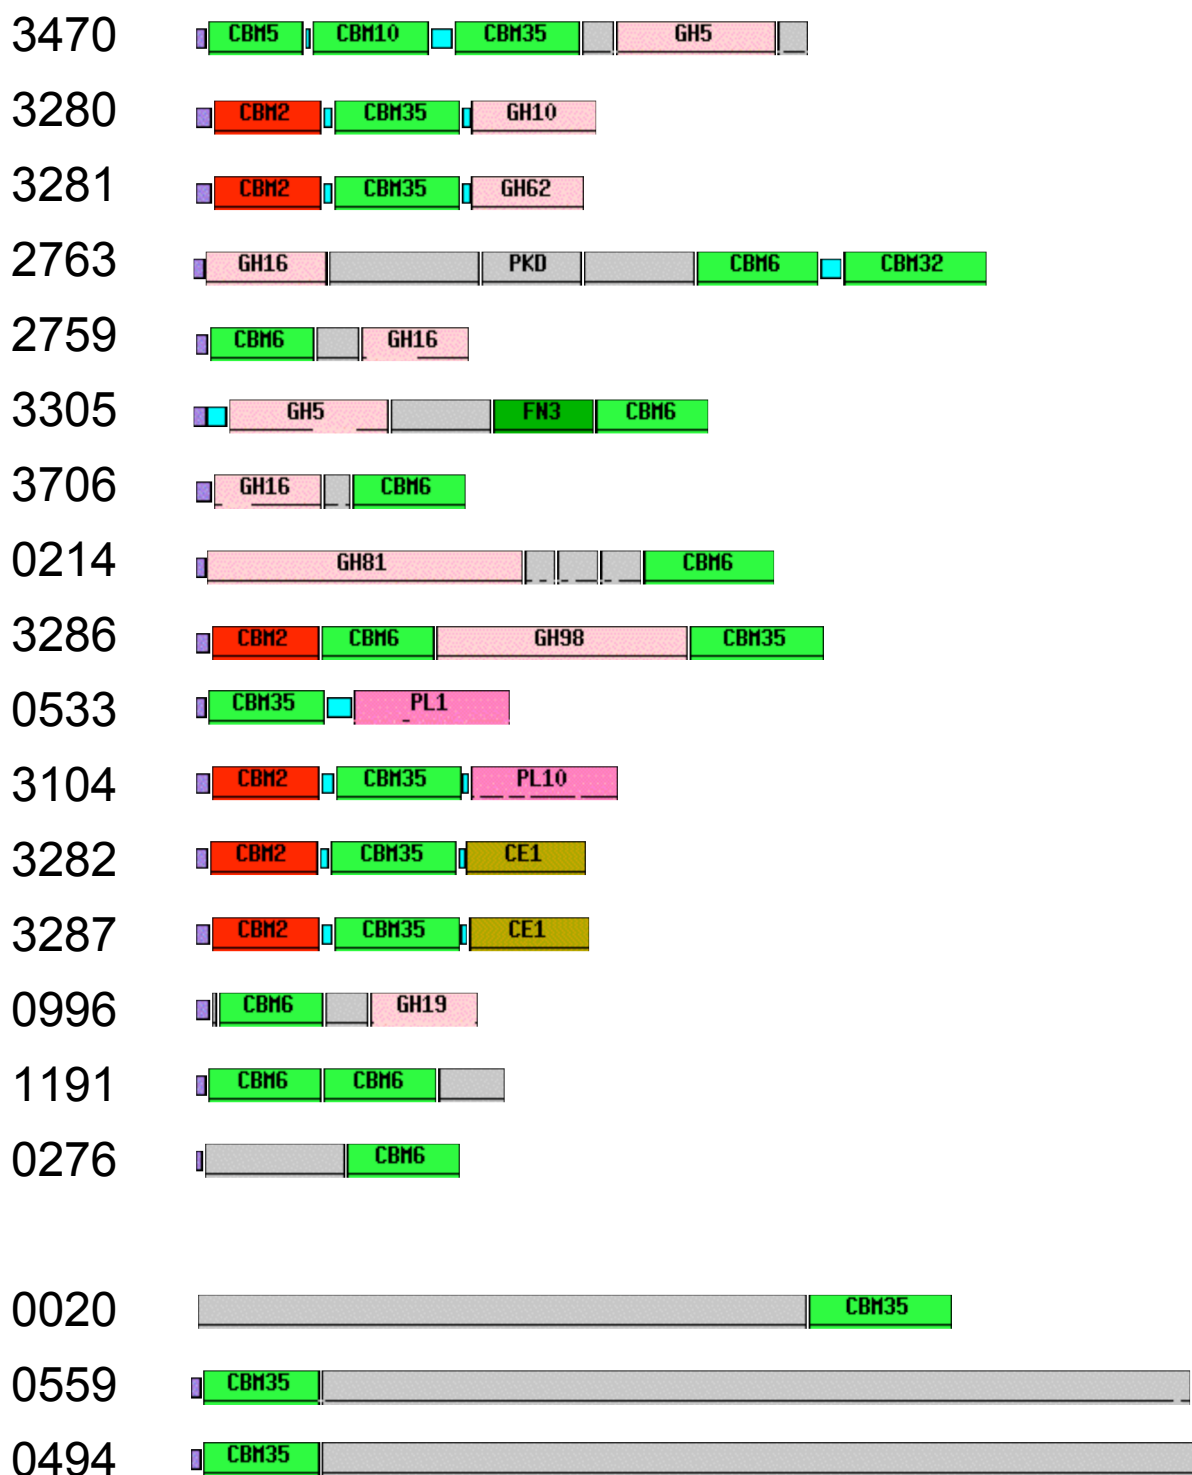

Supplement: supp_190_15_5455__1.pdf [file supp_190_15_5455__1.pdf]

**Fig. 2S *C. japonicus* CBM2-containing proteins**

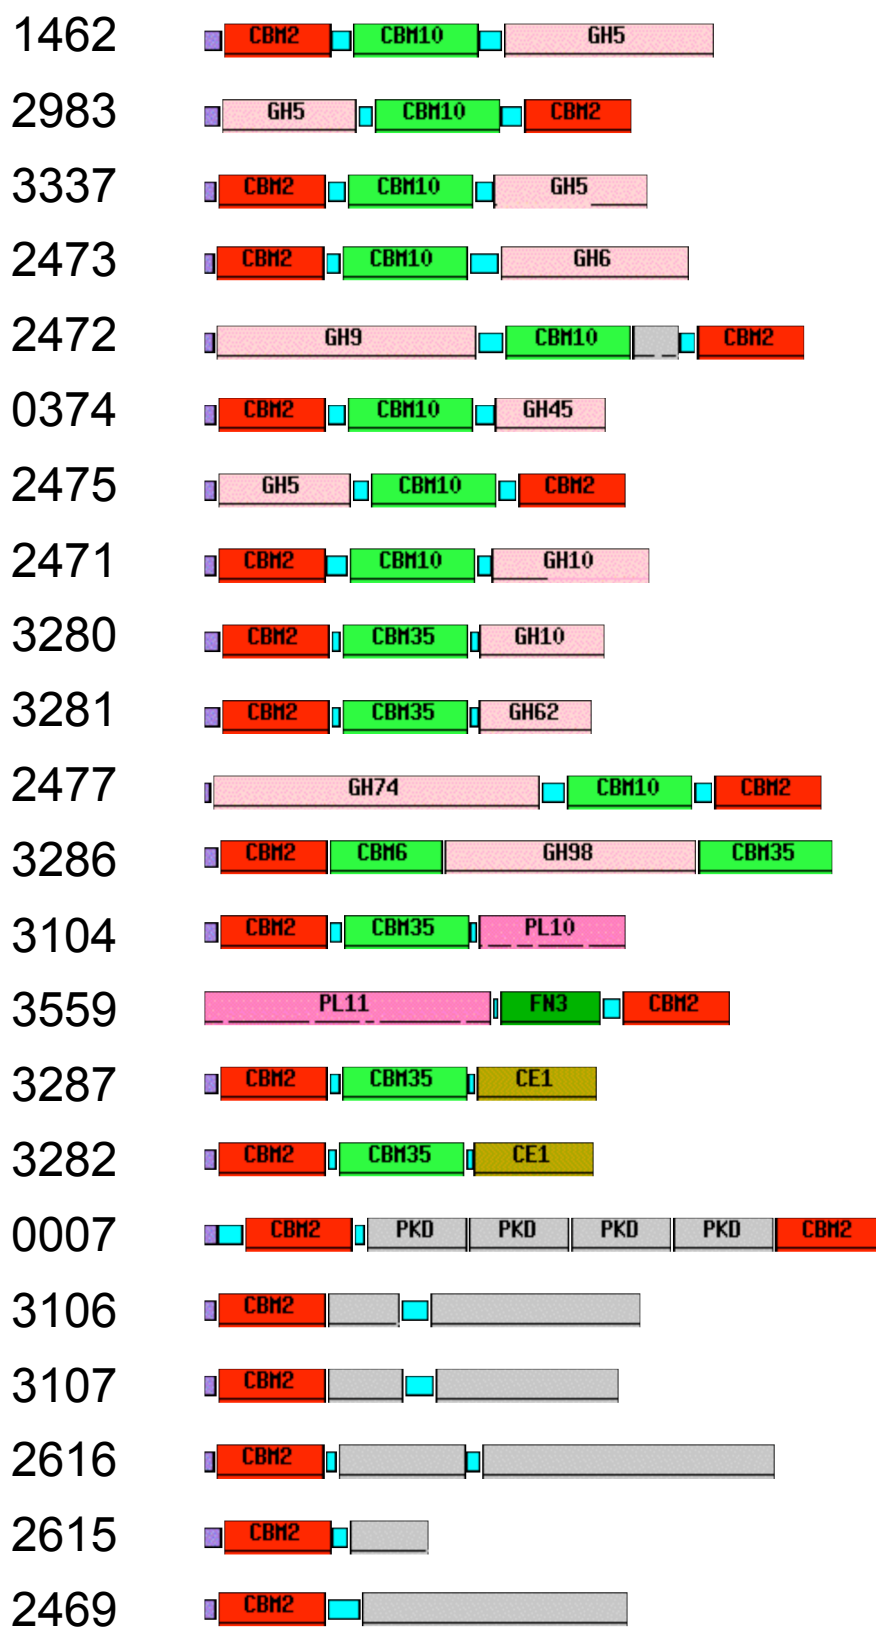

Supplement: supp_190_15_5455__2.pdf [file supp_190_15_5455__2.pdf]
